# Supplementary material for: Maternal mortality decline in Zimbabwe, 2007/2008 to 2018/2019: findings from mortality surveys using civil registration, vital statistics and health system data
Source: PubMed Central journal article supplement (PMC9358939; doi:10.1136/bmjgh-2022-009465), 2022-08-04
Supplement: bmjgh-2022-009465supp001.pdf [file bmjgh-2022-009465supp001.pdf]

## Supplementary online document

### Table S1: Background to Zimbabwe's maternal mortality ratio (MMR) changes, 2007-08 to 2018-19.

Zimbabwe experienced a severe socio-economic crisis that started in the late 1990s and reached its peak in 2008. The crisis caused hyperinflation and erosion of revenues, leading to government failure to adequately fund essential services, including health. Zimbabwe government's health strategies and numerous health sector assessments acknowledge this crisis.<sup>1-4</sup> The crisis caused deterioration of the health system to near-collapse, such that by 2009, about 80% of health facilities offering maternal, neonatal and child health services lacked essential commodities.<sup>5</sup> Skilled and experienced health workers deserted the health sector, such that in 2010, only 34% of doctors, 66% of nurses, 28% of pharmacists, 23% of environmental health officers and 45% of health services' administrator positions were staffed.<sup>4</sup> As the effects of the crisis continued, the health system scored 42% on general service availability, 69% on health infrastructure availability, 36% on core health workforce availability and 22% on service utilisation in a 2015 assessment.<sup>6</sup>

Zimbabwe being one of Southern Africa's high HIV burden countries, the HIV epidemic was taking its toll on the country in 2007-2008.<sup>7-10</sup> The roll-out of antiretroviral treatment (ART) had started in 2004 but was slow and was still in the early scaling-up phase by 2007-2008.<sup>11</sup> ART services were rolled out to only 5.2% (86 out of 1,643) of health facilities country-wide by December 2007 – mostly in provincial and tertiary hospitals, which are few and less accessible to communities.<sup>12</sup> In December 2008, 17% (282 out of 1643) health facilities offered ART services country-wide, and 24% (148,144/596,965) HIV-positive people were on ART (the need for ART defined by a CD4 count below 350 cells per microlitre (cells/ $\mu$ L) of blood).<sup>12,13</sup> In the same period, a debilitating cholera epidemic broke out in all provinces of the country from July to November 2008.<sup>14</sup>

In 2007-2008, the Ministry of Health commissioned the first of the two maternal mortality surveys included in this study. Preliminary findings of this survey reported an MMR of 725 maternal deaths per 100 000 livebirths, HIV complications being the leading cause, contributing to 26% of the deaths.<sup>15</sup> Concern arose locally and internationally about the findings. Consequently, the Ministry of Health and its partners instituted a raft of measures to address the maternal health situation. A maternal and neonatal health roadmap was developed to promote the four pillars of Safe Motherhood;<sup>16</sup> namely: (i) family planning and antenatal care, (ii) clean and safe delivery for the mother and newborn, (iii) essential obstetric and neonatal care – including obstetric and neonatal first aid, and (iv) basic emergency obstetric and neonatal care (BEmONC) and comprehensive obstetric and neonatal care (CEmONC). The strategies were (i) to train healthcare workers in these interventions, (ii) roll out BEmONC in primary care facilities and CEmONC in secondary and tertiary facilities, (iii) integrate family planning and prevention of mother-to-child transmission (PMTCT) of HIV services in Maternal, Newborn and Child Health (MNCH), and (iv) community mobilisation.

Following the crisis of 2007-2008, a government of national unity was formed in 2009, which began to reverse the socio-economic crisis.<sup>17,18</sup> Donor funding increased to support the country's socio-economic recovery, targeting strategic sectors such as health.<sup>3</sup> MNCH donors created two grants to revitalise the health system and improve MNCH services. The health transition fund (HTF) of US\$ 235 million was implemented from 2012 to 2015, and the health development fund (HDF) of US\$ 682 million, from 2016 to 2020.<sup>17-19</sup> European governments pooled the grants

through UNICEF. The HTF and HDF supported retention allowances for the health workforce (nurses and doctors) in rural areas and supply of essential medicines and commodities. Through a result-based financing (RBF) component, the grants funded operations and renovations in rural health facilities and community interventions. User fees were removed in rural health facilities. The availability of essential commodities such as antibiotics and blood for obstetric emergencies improved due to a dedicated monthly resupply program of emergency obstetric and neonatal care consumables.<sup>5,20</sup> Overall, fundamentals of Zimbabwe's health system began to improve.<sup>21</sup>

In the execution of the MNCH roadmap activities, the Ministry of Health rolled out trainings in the management of obstetric and neonatal emergencies nationwide, supported by the UK's Royal College of Obstetricians and Gynaecologists (RCOG)<sup>22</sup>. Trainers from the Liverpool School of Tropical Medicine (Making it Happen Project) and Bristol University (Alarm Project) facilitated the training of local trainers (120 doctors and nurse midwives became certified national trainers). In the end, more than 700 doctors and nurse midwives received the downstream training. During this time, the Ministry of Health established twelve new midwifery schools. The Ministry also resumed the training of advanced clinical officers, and expanded the training of nurse anaesthetists who were all recruited from rural district hospitals. Maternity waiting homes, which started in the 1980s, were expanded.<sup>20,23-25</sup> An additional 105 were established or renovated in rural health institutions, funded by the HTF and HDF, and other donors.

UNFPA, WHO, UNICEF and others supported the Ministry of Health to set up a Maternal and Perinatal Death Surveillance and Response (MPDSR) system.<sup>26</sup> Guidelines for maternal and perinatal death audits were developed.<sup>27</sup> The Ministry instituted the audit system, establishing audit committees at all health facilities providing maternity services and district, provincial and national levels of the Ministry. A surveillance system for reporting maternal deaths from health facilities to the Ministry's head office was established. Health facilities began to audit deaths, and complete and submit maternal death audit forms to the national level where the data were analysed. The national maternal and perinatal death audit committee audited some of the deaths reported by the sub-national committees. They gave feedback to the lower committees to improve the audits and management of maternal and neonatal cases at those levels. However, the surveillance system experienced challenges such as delayed and incomplete reporting but routine analysis of the data informed policies, scaling up of the interventions and resource allocation, while most audit recommendations would not be implemented because of limited resources.<sup>28</sup>

HIV programs also received significant funding through the crisis period, which exceeded US\$ 400 million annually.<sup>29,30</sup> The Global Fund to Fight AIDS, Tuberculosis and Malaria and the United States President's Emergency Program for AIDS Relief (PEPFAR) were the main funders. Private donors and domestic funding from 3% of all taxable employee and business incomes complemented the donor funding.<sup>30,31</sup> With this funding, the country rolled out ART to 91% (1,566/1,722) health facilities by December 2017,<sup>32</sup> and about 97% of adults (15-49 years) with known HIV-positive status were on ART by 2019.<sup>33</sup>

Through the Elizabeth Glaser Pediatric AIDS Foundation (EGPAF), the Children's Investment Fund Foundation (CIFF) funded the roll-out of WHO 2010 ("Option A") and 2013 ("Option B+") guidelines for PMTCT by over US\$ 100 million from 2011 to 2019. Under the "Option B+" guidelines, HIV-infected pregnant women were initiated on life-long ART irrespective of disease stage.<sup>34,35</sup> The ART and PMTCT programs had such an impact that by the year 2019,

88% of adult women (15-49 years) living with HIV had known status, of which 98% were on ART.<sup>33</sup> Consequently, a substantial decline in HIV-associated mortality in the adult populations was observed in 2009.<sup>10</sup>

Zimbabwe achieved these gains in the health sector because of targeted, evidence-based interventions implemented by the government and its partners. Maternal and perinatal health improved, despite a continued depression in other sectors of the country – farming, manufacturing, food security, employment, education, and others. The Government of Zimbabwe contributed to the funding of these interventions through its fiscus and the AIDS trust fund<sup>3,36</sup> but a significant proportion of the resources came from international donors.

**Table S2: Design effect calculations for 2007-08 and 2018-19 surveys**

| District     | Population (n <sub>i</sub> ) | Deaths (d <sub>i</sub> ) |          | Y <sub>i</sub> | X <sub>i</sub> | R(i)                                | R <sub>i</sub>                            | R <sub>i</sub> -R     | (R <sub>i</sub> -R) <sup>2</sup> |
|--------------|------------------------------|--------------------------|----------|----------------|----------------|-------------------------------------|-------------------------------------------|-----------------------|----------------------------------|
|              |                              |                          |          |                |                | R(i)=Y <sub>i</sub> /X <sub>i</sub> | R <sub>i</sub> =K <sub>r</sub> -(k-1)R(i) |                       |                                  |
| Nkulumane    | 4387                         | 62                       |          | 46883          | 275            | 0.005871                            | 0.013564577                               | 0.00699438            | 4.89214E-05                      |
| Harare SE    | 1995                         | 13                       |          | 49275          | 324            | 0.006582                            | 0.006448824                               | -0.0001214            | 1.47312E-08                      |
| Harare W     | 5563                         | 33                       |          | 45707          | 303            | 0.006639                            | 0.005877185                               | -0.000693             | 4.80265E-07                      |
| Mutare       | 9666                         | 71                       |          | 41603          | 266            | 0.0064                              | 0.008273054                               | 0.00170286            | 2.89972E-06                      |
| Bindura      | 3230                         | 30                       |          | 48040          | 307            | 0.006393                            | 0.00833751                                | 0.00176731            | 3.1234E-06                       |
| Mutoko       | 3252                         | 24                       |          | 48018          | 313            | 0.00652                             | 0.007070706                               | 0.00050051            | 2.50509E-07                      |
| Zvimba       | 6729                         | 27                       |          | 44541          | 310            | 0.00695                             | 0.002775653                               | -0.0037945            | 1.43986E-05                      |
| Chivi        | 4186                         | 24                       |          | 47084          | 313            | 0.00665                             | 0.005776449                               | -0.0007937            | 6.30035E-07                      |
| Tsholotsho   | 2867                         | 15                       |          | 48403          | 322            | 0.006656                            | 0.005715037                               | -0.0008552            | 7.31298E-07                      |
| Matobo       | 2049                         | 6                        |          | 49221          | 331            | 0.006719                            | 0.005079101                               | -0.0014911            | 2.22337E-06                      |
| Kwekwe       | 7347                         | 33                       |          | 43923          | 303            | 0.006909                            | 0.00318091                                | -0.0033893            | 1.14873E-05                      |
| <b>Total</b> | <b>51270</b>                 | <b>337</b>               |          | <b>512698</b>  | <b>3369</b>    | <b>0.072289</b>                     |                                           | <b>-0.000173</b>      | <b>0.000085160500</b>            |
| k=11         | R =                          | 0.006570197              |          |                |                |                                     |                                           | SE <sup>2</sup> =     | 7.74186E-07                      |
| CIs for MMR  | 0.004846                     | 0.006570197              | 0.008295 |                |                |                                     |                                           | SE (CDS)              | 0.000879879                      |
| 100000       | 484.5635                     | 657.0196581              | 829.4759 |                |                |                                     |                                           | S <sup>2</sup> (SRS)  | 0.005776361                      |
|              |                              |                          |          |                |                |                                     |                                           | SE <sup>2</sup> (SRS) | 1.26733E-07                      |
|              |                              |                          |          |                |                |                                     |                                           | <b>DE (2007-08)</b>   | <b>6.108790912</b>               |
| District     | Population (n <sub>i</sub> ) | Deaths (d <sub>i</sub> ) |          | Y <sub>i</sub> | X <sub>i</sub> | R(i)                                | R <sub>i</sub>                            | R <sub>i</sub> -R     | (R <sub>i</sub> -R) <sup>2</sup> |
|              |                              |                          |          |                |                | R(i)=Y <sub>i</sub> /X <sub>i</sub> | R <sub>i</sub> =K <sub>r</sub> -(k-1)R(i) |                       |                                  |
| Nkulumane    | 5748                         | 27                       |          | 84615          | 169            | 0.001992                            | 0.00391621                                | 0.00174888            | 3.05858E-06                      |
| Harare SE    | 3022                         | 4                        |          | 87341          | 192            | 0.002195                            | 0.001886315                               | -0.000281             | 7.89689E-08                      |
| Harare W     | 8977                         | 18                       |          | 81386          | 178            | 0.00219                             | 0.001943584                               | -0.0002237            | 5.00621E-08                      |
| Mutare       | 18129                        | 35                       |          | 72234          | 161            | 0.002229                            | 0.001553225                               | -0.0006141            | 3.77125E-07                      |
| Bindura      | 8613                         | 9                        |          | 81751          | 187            | 0.002287                            | 0.000969152                               | -0.0011982            | 1.43563E-06                      |
| Mutoko       | 6662                         | 22                       |          | 83702          | 173            | 0.002073                            | 0.003114492                               | 0.00094716            | 8.97117E-07                      |
| Zvimba       | 12497                        | 32                       |          | 77866          | 163            | 0.002099                            | 0.002848688                               | 0.00068136            | 4.64249E-07                      |
| Chivi        | 6863                         | 10                       |          | 83500          | 185            | 0.002221                            | 0.001627148                               | -0.0005402            | 2.91796E-07                      |
| Tsholotsho   | 4418                         | 4                        |          | 85945          | 192            | 0.002229                            | 0.001554031                               | -0.0006133            | 3.76135E-07                      |
| Matobo       | 3485                         | 13                       |          | 86878          | 183            | 0.002106                            | 0.002782394                               | 0.00061506            | 3.78304E-07                      |

|              |              |              |                |               |             |                 |             |                       |                       |
|--------------|--------------|--------------|----------------|---------------|-------------|-----------------|-------------|-----------------------|-----------------------|
| Kwekwe       | 11949        | 21           |                | 78414         | 175         | 0.002232        | 0.001518568 | -0.0006488            | 4.20891E-07           |
| <b>Total</b> | <b>90363</b> | <b>195.8</b> | <b>0.00217</b> | <b>903631</b> | <b>1958</b> | <b>0.023853</b> |             | <b>-0.000127</b>      | <b>0.000007828862</b> |
| k=11         | R =          | 0.00216733   |                |               |             |                 |             | SE <sup>2</sup> =     | 7.11715E-08           |
| CIs for MMR  | 0.001644     | 0.00216733   | 0.00269        |               |             |                 |             | SE (CDS)              | 0.00026678            |
| 100000       | 164.4441     | 216.732964   | 269.0218       |               |             |                 |             | SE <sup>2</sup> (SRS) | 4.03517E-08           |
|              |              |              |                |               |             |                 |             | <b>DE (2018-19)</b>   | <b>1.763779567</b>    |

**Table S3: Calculations for adjustment of community maternal deaths missed in 2018-19, using the proportion of 2007-08 maternal deaths as a standard.**

| District           | 2007-08 Deaths |                   |       | 2018-19 Unadjusted Deaths |                   |           | 2018-19 Adjusted Deaths     |                           |
|--------------------|----------------|-------------------|-------|---------------------------|-------------------|-----------|-----------------------------|---------------------------|
|                    | Community (a)  | Institutional (b) | Total | Community (d)             | Institutional (e) | Total (t) | Missed Community Deaths (x) | Total Adjusted Deaths (T) |
|                    | a              | b                 | -     | d                         | e                 | t         | x                           | T                         |
| Nkulumane-Bulawayo | 12             | 39                | 51    | 1                         | 18                | 19        | 5                           | 23.5                      |
| Harare SE          | 0              | 12                | 12    | 0                         | 4                 | 4         | 0                           | 4.0                       |
| Harare W           | 3              | 27                | 30    | 5                         | 11                | 16        | 0                           | 16.0                      |
| Mutare             | 13             | 44                | 57    | 7                         | 22                | 29        | 0                           | 29.0                      |
| Bindura            | 11             | 16                | 27    | 3                         | 5                 | 8         | 0                           | 8.4                       |
| Mutoko             | 12             | 10                | 22    | 3                         | 9                 | 12        | 8                           | 19.8                      |
| Zvimba             | 14             | 11                | 25    | 2                         | 12                | 14        | 13                          | 27.3                      |
| Chivi              | 13             | 9                 | 22    | 1                         | 4                 | 5         | 5                           | 9.8                       |
| Tsholotsho.        | 4              | 10                | 14    | 0                         | 3                 | 3         | 1                           | 4.2                       |
| Matobo             | 4              | 2                 | 6     | 0                         | 4                 | 4         | 8                           | 12.0                      |
| Kwekwe             | 9              | 21                | 30    | 3                         | 13                | 16        | 3                           | 18.6                      |
| Total              | 95             | 201               | 296   | 25                        | 105               | 130       | 43                          | 172.6                     |

NB: a to T denote the variables used in the model. The adjustment model formulas are:  $x = ae/b - d$ ;  $T = t + ae/b - d$

**Table S4: Adjustment of DHIS2 live births (2018-19) using correction factors from 2019 MICS' GFR and expected pregnancies data from ZimStat.**

| District           | Population | General Fertility rate | Estimated births | Expected pregnancies 2019 | DHIS2 Births | Proportion DHIS2 to GFR estimated livebirths | Proportion DHIS2 to expected pregnancies | Birth adjustment / correction factor | Adjusted births |
|--------------------|------------|------------------------|------------------|---------------------------|--------------|----------------------------------------------|------------------------------------------|--------------------------------------|-----------------|
| Nkulumane-Bulawayo | 42985      | 0.1006                 | 4324             | 2775                      | 5363         | 124%                                         | 193%                                     | 1.00                                 | 5363            |
| Harare SE          | 31755      | 0.1006                 | 3195             | 2057                      | 2240         | 70%                                          | 109%                                     | 1.30                                 | 2912            |
| Harare W           | 81655      | 0.1006                 | 8214             | 5036                      | 7081         | 86%                                          | 141%                                     | 1.14                                 | 8072            |
| Mutare             | 148616     | 0.1006                 | 14951            | 17112                     | 13200        | 88%                                          | 77%                                      | 1.12                                 | 14784           |
| Bindura            | 58789      | 0.1424                 | 8372             | 6426                      | 5982         | 71%                                          | 93%                                      | 1.30                                 | 7777            |
| Mutoko             | 44069      | 0.1424                 | 6275             | 5560                      | 5348         | 85%                                          | 96%                                      | 1.15                                 | 6150            |
| Zvimba             | 85113      | 0.1424                 | 12120            | 10007                     | 8316         | 69%                                          | 83%                                      | 1.30                                 | 10811           |
| Chivi              | 49311      | 0.1424                 | 7022             | 6318                      | 4863         | 69%                                          | 77%                                      | 1.30                                 | 6322            |
| Tsholotsho.        | 31363      | 0.1424                 | 4466             | 4380                      | 3221         | 72%                                          | 74%                                      | 1.30                                 | 4187            |
| Matobo             | 25052      | 0.1424                 | 3567             | 3574                      | 2569         | 72%                                          | 72%                                      | 1.30                                 | 3340            |

|        |        |        |       |       |       |     |     |      |       |
|--------|--------|--------|-------|-------|-------|-----|-----|------|-------|
| Kwekwe | 105468 | 0.1006 | 10610 | 11854 | 9042  | 85% | 76% | 1.15 | 10398 |
| Total  | 704176 |        | 83117 | 75099 | 67225 | 81% | 90% | 1.21 | 80116 |

MICS - Multiple Indicator Cluster Survey; GFR - General Fertility Rate; ZimStat - Zimbabwe Statistical Agency

**Table S5: Weighting calculation for clustering-adjusted mortality rates among women of reproductive ages, 2007-08 and 2018-19, weighting by location (districts).**

a) Weighting for population of women of reproductive ages, 2007-08

| District               | Population (n <sub>i</sub> ) | Deaths (d <sub>i</sub> ) | Proportion died (p <sub>i</sub> ) | Variance <sup>1</sup> | Weight <sup>2</sup> (w <sub>i</sub> ) | Product (w <sub>i</sub> *p <sub>i</sub> ) |
|------------------------|------------------------------|--------------------------|-----------------------------------|-----------------------|---------------------------------------|-------------------------------------------|
|                        |                              |                          |                                   | (v <sub>i</sub> )     |                                       |                                           |
| Nkulumane              | 41464                        | 1479                     | 0.069066838                       | 1.55E-06              | 6.45E+05                              | 4.45E+04                                  |
| Harare SE <sup>1</sup> | 24193                        | 141                      | 0.040298428                       | 1.60E-06              | 6.26E+05                              | 2.52E+04                                  |
| Harare W <sup>1</sup>  | 62211                        | 635                      | 0.103625243                       | 1.49E-06              | 6.70E+05                              | 6.94E+04                                  |
| Mutare                 | 123954                       | 974                      | 0.206470935                       | 1.32E-06              | 7.57E+05                              | 1.56E+05                                  |
| Bindura                | 43220                        | 326                      | 0.071991818                       | 1.55E-06              | 6.47E+05                              | 4.66E+04                                  |
| Mutoko                 | 37956                        | 331                      | 0.063223541                       | 1.56E-06              | 6.41E+05                              | 4.05E+04                                  |
| Zvimba                 | 67396                        | 548                      | 0.112261929                       | 1.48E-06              | 6.76E+05                              | 7.59E+04                                  |
| Chivi                  | 47866                        | 264                      | 0.079730689                       | 1.53E-06              | 6.52E+05                              | 5.20E+04                                  |
| Tsholotsho             | 34533                        | 357                      | 0.057521829                       | 1.57E-06              | 6.37E+05                              | 3.66E+04                                  |
| Matobo                 | 28037                        | 314                      | 0.046701402                       | 1.59E-06              | 6.30E+05                              | 2.94E+04                                  |
| Kwekwe                 | 89516                        | 819                      | 0.149107348                       | 1.42E-06              | 7.06E+05                              | 1.05E+05                                  |
| Total                  | 600346                       | 6188                     | 1.000000000                       | 0.00E+00              | 7285440                               | 681634                                    |

<sup>1</sup> Variance =  $\pi(1-\pi)/n$ ; <sup>2</sup> Weight =  $1/v_i$ ; <sup>3</sup> Mortality rate =  $(\sum w_i \cdot \pi_i / \sum w_i) \cdot 1000$

b) Weighting for deaths of women of reproductive ages, Incidence Rate (IR) and 95% Confidence Intervals (CI), 2007-08

| District               | Population (n <sub>i</sub> ) | Deaths (d <sub>i</sub> ) | Proportion died (p <sub>i</sub> ) | Variance <sup>1</sup> | Weight <sup>2</sup> (w <sub>i</sub> ) | Product (w <sub>i</sub> *p <sub>i</sub> ) |
|------------------------|------------------------------|--------------------------|-----------------------------------|-----------------------|---------------------------------------|-------------------------------------------|
|                        |                              |                          |                                   | (v <sub>i</sub> )     |                                       |                                           |
| Nkulumane              | 41464                        | 1479                     | 0.239010989                       | 1.23E-04              | 8.13E+03                              | 1.94E+03                                  |
| Harare SE <sup>1</sup> | 24193                        | 141                      | 0.022786037                       | 1.58E-04              | 6.33E+03                              | 1.44E+02                                  |
| Harare W <sup>1</sup>  | 62211                        | 635                      | 0.10261797                        | 1.45E-04              | 6.90E+03                              | 7.08E+02                                  |
| Mutare                 | 123954                       | 974                      | 0.157401422                       | 1.36E-04              | 7.34E+03                              | 1.16E+03                                  |
| Bindura                | 43220                        | 326                      | 0.052682612                       | 1.53E-04              | 6.53E+03                              | 3.44E+02                                  |
| Mutoko                 | 37956                        | 331                      | 0.053490627                       | 1.53E-04              | 6.54E+03                              | 3.50E+02                                  |
| Zvimba                 | 67396                        | 548                      | 0.0885585                         | 1.47E-04              | 6.79E+03                              | 6.01E+02                                  |
| Chivi                  | 47866                        | 264                      | 0.042663219                       | 1.55E-04              | 6.46E+03                              | 2.76E+02                                  |
| Tsholotsho             | 34533                        | 357                      | 0.057692308                       | 1.52E-04              | 6.57E+03                              | 3.79E+02                                  |
| Matobo                 | 28037                        | 314                      | 0.050743374                       | 1.53E-04              | 6.52E+03                              | 3.31E+02                                  |
| Kwekwe                 | 89516                        | 819                      | 0.132352941                       | 1.40E-04              | 7.13E+03                              | 9.44E+02                                  |
| Total                  | 600346                       | 6188                     | 1.000000000                       | -3.70E-22             | 75244                                 | 7176                                      |
| IR                     |                              |                          | 0.01052734                        | 1.03E+01              | 10.53                                 | 1.08E+01                                  |

## c) Weighting for population of women of reproductive ages, 2018-19

| District               | Population (n <sub>i</sub> ) | Deaths (d <sub>i</sub> ) | Proportion died (p <sub>i</sub> ) | Variance <sup>1</sup> | Weight <sup>2</sup> (w <sub>i</sub> ) | Product (w <sub>i</sub> *p <sub>i</sub> ) |
|------------------------|------------------------------|--------------------------|-----------------------------------|-----------------------|---------------------------------------|-------------------------------------------|
|                        |                              |                          |                                   | (v <sub>i</sub> )     |                                       |                                           |
| Nkulumane              | 42985                        | 397                      | 0.061042978                       | 1.33E-06              | 7.50E+05                              | 4.58E+04                                  |
| Harare SE <sup>1</sup> | 31755                        | 54                       | 0.04509526                        | 1.36E-06              | 7.37E+05                              | 3.33E+04                                  |
| Harare W <sup>1</sup>  | 81655                        | 227                      | 0.115958226                       | 1.26E-06              | 7.97E+05                              | 9.24E+04                                  |
| Mutare                 | 148616                       | 367                      | 0.21104951                        | 1.12E-06              | 8.93E+05                              | 1.88E+05                                  |
| Bindura                | 58789                        | 133                      | 0.083486231                       | 1.30E-06              | 7.68E+05                              | 6.41E+04                                  |
| Mutoko                 | 44069                        | 82                       | 0.062582366                       | 1.33E-06              | 7.51E+05                              | 4.70E+04                                  |
| Zvimba                 | 85113                        | 156                      | 0.12086893                        | 1.25E-06              | 8.01E+05                              | 9.68E+04                                  |
| Chivi                  | 49311                        | 114                      | 0.070026527                       | 1.32E-06              | 7.57E+05                              | 5.30E+04                                  |
| Tsholotsho             | 31363                        | 79                       | 0.044538581                       | 1.36E-06              | 7.37E+05                              | 3.28E+04                                  |
| Matobo                 | 25052                        | 128                      | 0.035576333                       | 1.37E-06              | 7.30E+05                              | 2.60E+04                                  |
| Kwekwe                 | 105468                       | 119                      | 0.149775056                       | 1.21E-06              | 8.28E+05                              | 1.24E+05                                  |
| Total                  | 704176                       | 1856                     | 1.0000000000                      | 0.00E+00              | 8549550                               | 803614                                    |

<sup>1</sup> Variance (v<sub>i</sub>) = p<sub>i</sub>(1-p<sub>i</sub>)/n<sub>i</sub>; <sup>2</sup> Weight (w<sub>i</sub>) = 1/v<sub>i</sub>; <sup>3</sup> Mortality rate = (∑w<sub>i</sub>\*p<sub>i</sub> / ∑w<sub>i</sub>)\*1000; <sup>4</sup> 95% CI = (p' +/- z\*SQRT(p'(1-p')/n))\*1000;

## d) Weighting for deaths of women of reproductive ages, Incidence Rate (IR) and 95% Confidence Intervals (CI), 2018-19

| District               | Population (n <sub>i</sub> ) | Deaths (d <sub>i</sub> ) | Proportion died (p <sub>i</sub> ) | Variance <sup>1</sup> | Weight <sup>2</sup> (w <sub>i</sub> ) | Product (w <sub>i</sub> *p <sub>i</sub> ) |
|------------------------|------------------------------|--------------------------|-----------------------------------|-----------------------|---------------------------------------|-------------------------------------------|
|                        |                              |                          |                                   | (v <sub>i</sub> )     |                                       |                                           |
| Nkulumane              | 42985                        | 397                      | 0.213900862                       | 4.24E-04              | 2.36E+03                              | 5.05E+02                                  |
| Harare SE <sup>1</sup> | 31755                        | 54                       | 0.029094828                       | 5.23E-04              | 1.91E+03                              | 5.56E+01                                  |
| Harare W <sup>1</sup>  | 81655                        | 227                      | 0.122306034                       | 4.73E-04              | 2.11E+03                              | 2.59E+02                                  |
| Mutare                 | 148616                       | 367                      | 0.197737069                       | 4.32E-04              | 2.31E+03                              | 4.57E+02                                  |
| Bindura                | 58789                        | 133                      | 0.071659483                       | 5.00E-04              | 2.00E+03                              | 1.43E+02                                  |
| Mutoko                 | 44069                        | 82                       | 0.044181034                       | 5.15E-04              | 1.94E+03                              | 8.58E+01                                  |
| Zvimba                 | 85113                        | 156                      | 0.084051724                       | 4.94E-04              | 2.03E+03                              | 1.70E+02                                  |
| Chivi                  | 49311                        | 114                      | 0.061422414                       | 5.06E-04              | 1.98E+03                              | 1.21E+02                                  |
| Tsholotsho             | 31363                        | 79                       | 0.042564655                       | 5.16E-04              | 1.94E+03                              | 8.25E+01                                  |
| Matobo                 | 25052                        | 128                      | 0.068965517                       | 5.02E-04              | 1.99E+03                              | 1.37E+02                                  |
| Kwekwe                 | 105468                       | 119                      | 0.064116379                       | 5.04E-04              | 1.98E+03                              | 1.27E+02                                  |
| Total                  | 704176                       | 1856                     | 1.0000000000                      | 0.00E+00              | 22561                                 | 2145                                      |
| IR, 95% CI             |                              |                          | 0.00266883                        | 2.56E+00              | 2.67                                  | 2.78E+00                                  |

**Table S6: Weighting calculations for clustering-adjusted maternal mortality ratio (MMR) among women of reproductive ages, 2007-08 and 2018-19.**

## a) Weighting for live births, 2007-08

| District  | Population (n <sub>i</sub> ) | Deaths (d <sub>i</sub> ) | Population proportion (p <sub>i</sub> ) | Variance <sup>1</sup> | Weight <sup>2</sup> (w <sub>i</sub> ) | Product (w <sub>i</sub> *p <sub>i</sub> ) |
|-----------|------------------------------|--------------------------|-----------------------------------------|-----------------------|---------------------------------------|-------------------------------------------|
|           |                              |                          |                                         | (v <sub>i</sub> )     |                                       |                                           |
| Nkulumane | 4002                         | 51                       | 0.087804                                | 2.00E-05              | 49966                                 | 4387                                      |

|                                                                                                                                                                                                                                               |       |     |          |          |        |       |
|-----------------------------------------------------------------------------------------------------------------------------------------------------------------------------------------------------------------------------------------------|-------|-----|----------|----------|--------|-------|
| Harare SE                                                                                                                                                                                                                                     | 1911  | 12  | 0.041927 | 2.10E-05 | 47574  | 1995  |
| Harare W                                                                                                                                                                                                                                      | 4958  | 30  | 0.108778 | 1.96E-05 | 51142  | 5563  |
| Mutare                                                                                                                                                                                                                                        | 7975  | 57  | 0.174971 | 1.81E-05 | 55245  | 9666  |
| Bindura                                                                                                                                                                                                                                       | 3016  | 27  | 0.066171 | 2.05E-05 | 48809  | 3230  |
| Mutoko                                                                                                                                                                                                                                        | 3035  | 22  | 0.066588 | 2.05E-05 | 48831  | 3252  |
| Zvimba                                                                                                                                                                                                                                        | 5863  | 25  | 0.128634 | 1.91E-05 | 52308  | 6729  |
| Chivi                                                                                                                                                                                                                                         | 3834  | 22  | 0.084118 | 2.01E-05 | 49765  | 4186  |
| Tsholotsho                                                                                                                                                                                                                                    | 2697  | 14  | 0.059172 | 2.06E-05 | 48446  | 2867  |
| Matobo                                                                                                                                                                                                                                        | 1961  | 6   | 0.043024 | 2.10E-05 | 47628  | 2049  |
| Kwekwe                                                                                                                                                                                                                                        | 6327  | 30  | 0.138814 | 1.89E-05 | 52926  | 7347  |
| Total                                                                                                                                                                                                                                         | 45579 | 296 | 1.000000 | 0.00E+00 | 552639 | 51270 |
| <sup>1</sup> Variance ( $v_i$ ) = $\pi_i(1-\pi_i)/n_i$ ; <sup>2</sup> Weight ( $w_i$ ) = $1/v_i$ ; <sup>3</sup> Mortality rate = $(\sum w_i \pi_i / \sum w_i) * 1000$ ; <sup>4</sup> 95% CI = $(p' \pm z * \text{SQRT}(p'(1-p')/n)) * 1000$ ; |       |     |          |          |        |       |

## b) Weighting for maternal deaths, unweighted and weighted MMR, and 95% CIs, 2007-08

| District               | Population ( $n_i$ ) | Deaths ( $d_i$ ) | Proportion died ( $\pi_i$ ) | Variance <sup>1</sup> | Weight <sup>2</sup> ( $w_i$ ) | Product ( $w_i \pi_i$ ) |
|------------------------|----------------------|------------------|-----------------------------|-----------------------|-------------------------------|-------------------------|
|                        |                      |                  |                             | ( $v_i$ )             |                               |                         |
| Nkulumane              | 4002                 | 51               | 0.172297                    | 2.80E-03              | 358                           | 62                      |
| Harare SE              | 1911                 | 12               | 0.040541                    | 3.24E-03              | 309                           | 13                      |
| Harare W               | 4958                 | 30               | 0.101351                    | 3.04E-03              | 329                           | 33                      |
| Mutare                 | 7975                 | 57               | 0.192568                    | 2.73E-03              | 367                           | 71                      |
| Bindura                | 3016                 | 27               | 0.091216                    | 3.07E-03              | 326                           | 30                      |
| Mutoko                 | 3035                 | 22               | 0.074324                    | 3.13E-03              | 320                           | 24                      |
| Zvimba                 | 5863                 | 25               | 0.084459                    | 3.09E-03              | 323                           | 27                      |
| Chivi                  | 3834                 | 22               | 0.074324                    | 3.13E-03              | 320                           | 24                      |
| Tsholotsho             | 2697                 | 14               | 0.047297                    | 3.22E-03              | 311                           | 15                      |
| Matobo                 | 1961                 | 6                | 0.020270                    | 3.31E-03              | 302                           | 6                       |
| Kwekwe                 | 6327                 | 30               | 0.101351                    | 3.04E-03              | 329                           | 33                      |
| Total                  | 45579                | 296              | 1.000000                    | 0.00E+00              | 3593                          | 337                     |
| Unweighted MMR, 95% CI |                      | 0.0064942        | 0.00649422                  | 5.7568E+02            | 649.42                        | 7.232E+02               |
| Weighted MMR, 95% CI   |                      |                  | 0.00657020                  | 5.8709E+02            | 657.02                        | 7.270E+02               |

## c) Weighting for live births, 2018-19

| District   | Population ( $n_i$ ) | Deaths ( $d_i$ ) | Population proportion ( $\pi_i$ ) | Variance <sup>1</sup> | Weight <sup>2</sup> ( $w_i$ ) | Product ( $w_i \pi_i$ ) |
|------------|----------------------|------------------|-----------------------------------|-----------------------|-------------------------------|-------------------------|
|            |                      |                  |                                   | ( $v_i$ )             |                               |                         |
| Nkulumane  | 5363                 | 23.5             | 0.066940                          | 1.16E-05              | 85864                         | 5748                    |
| Harare SE  | 2912                 | 4.0              | 0.036347                          | 1.20E-05              | 83138                         | 3022                    |
| Harare W   | 8072                 | 16.0             | 0.100758                          | 1.12E-05              | 89093                         | 8977                    |
| Mutare     | 14784                | 29.0             | 0.184532                          | 1.02E-05              | 98246                         | 18129                   |
| Bindura    | 7777                 | 8.4              | 0.097067                          | 1.13E-05              | 88729                         | 8613                    |
| Mutoko     | 6150                 | 19.8             | 0.076766                          | 1.15E-05              | 86778                         | 6662                    |
| Zvimba     | 10811                | 27.3             | 0.134939                          | 1.08E-05              | 92613                         | 12497                   |
| Chivi      | 6322                 | 9.8              | 0.078909                          | 1.15E-05              | 86980                         | 6863                    |
| Tsholotsho | 4187                 | 4.2              | 0.052265                          | 1.18E-05              | 84534                         | 4418                    |

|        |       |       |          |          |        |       |
|--------|-------|-------|----------|----------|--------|-------|
| Matobo | 3340  | 12.0  | 0.041686 | 1.20E-05 | 83601  | 3485  |
| Kwekwe | 10398 | 18.6  | 0.129790 | 1.09E-05 | 92065  | 11949 |
| Total  | 80116 | 172.6 | 1.000000 | 0.00E+00 | 971641 | 90363 |

d) Weighting for maternal deaths, unweighted and weighted MMRs, and 95% CIs, 2018-19

| District               | Population (n <sub>i</sub> ) | Deaths (d <sub>i</sub> ) | Proportion died (p <sub>i</sub> ) | Variance <sup>1</sup> | Weight <sup>2</sup> (w <sub>i</sub> ) | Product (w <sub>i</sub> *p <sub>i</sub> ) |
|------------------------|------------------------------|--------------------------|-----------------------------------|-----------------------|---------------------------------------|-------------------------------------------|
|                        |                              |                          |                                   | (v <sub>i</sub> )     |                                       |                                           |
| Nkulumane              | 5363                         | 23.5                     | 0.136377                          | 5.00E-03              | 200                                   | 27                                        |
| Harare SE              | 2912                         | 4.0                      | 0.023175                          | 5.66E-03              | 177                                   | 4                                         |
| Harare W               | 8072                         | 16.0                     | 0.092701                          | 5.26E-03              | 190                                   | 18                                        |
| Mutare                 | 14784                        | 29.0                     | 0.168021                          | 4.82E-03              | 207                                   | 35                                        |
| Bindura                | 7777                         | 8.4                      | 0.048885                          | 5.51E-03              | 181                                   | 9                                         |
| Mutoko                 | 6150                         | 19.8                     | 0.114718                          | 5.13E-03              | 195                                   | 22                                        |
| Zvimba                 | 10811                        | 27.3                     | 0.158013                          | 4.88E-03              | 205                                   | 32                                        |
| Chivi                  | 6322                         | 9.8                      | 0.056651                          | 5.47E-03              | 183                                   | 10                                        |
| Tsholotsho             | 4187                         | 4.2                      | 0.024334                          | 5.65E-03              | 177                                   | 4                                         |
| Matobo                 | 3340                         | 12.0                     | 0.069526                          | 5.39E-03              | 185                                   | 13                                        |
| Kwekwe                 | 10398                        | 18.6                     | 0.107599                          | 5.17E-03              | 193                                   | 21                                        |
| Total                  | 80116                        | 172.6                    | 1.000000                          | 0.00E+00              | 2094                                  | 196                                       |
| Unweighted MMR, 95% CI |                              | 0.0021543                | 0.00215435                        | 1.8333E+02            | 215.43                                | 2.475E+02                                 |
| Weighted MMR, 95% CI   |                              |                          | 0.00216733                        | 1.8641E+02            | 216.73                                | 2.471E+02                                 |

**Table S7: ANOVA Tables<sup>1</sup> for repeated measures, before-and-after comparison of 2008-07 and 2018-19 MMRs, Zimbabwe RAMOS.**

Given that the second survey used the same district clusters as the first survey, we performed additional statistical comparison using the repeated-measures method of One-Way ANOVA, using the online calculator available at <https://www.socscistatistics.com/tests/anova/default2.aspx>. The assumptions of the analysis are that the interventions and contextual factors of the MMR changes before 2007-08 and to 2018-19 measurement points are two treatments and comparison of the MMRs is comparison of two treatment effects. The data are fitted to a one-way ANOVA model because one factor, location, was available in the data for analysis.

Below are the results of the analysis in three tables, as guided by Ardelean's paper.<sup>2</sup>

a) Values from MMR calculations

| District | 2007-08 MMR | 2018-19 MMR |
|----------|-------------|-------------|
|----------|-------------|-------------|

<sup>1</sup> Calculations performed using the ANOVA online calculator available at <https://www.socscistatistics.com/tests/anova/default2.aspx> (Accessed 31 Jan 2022)

<sup>2</sup> MATEC Web of Conferences: Available at: [chrome-extension://efaidnbmnnnibpcjgclcfnefmkj/viewer.html?pdfurl=https%3A%2F%2Fwww.matec-conferences.org%2Farticles%2Fmatecconf%2Fpdf%2F2017%2F40%2Fmatecconf\\_imtoradea2017\\_04008.pdf&len=413721&chunk=true](chrome-extension://efaidnbmnnnibpcjgclcfnefmkj/viewer.html?pdfurl=https%3A%2F%2Fwww.matec-conferences.org%2Farticles%2Fmatecconf%2Fpdf%2F2017%2F40%2Fmatecconf_imtoradea2017_04008.pdf&len=413721&chunk=true) (Accessed 31 Jan 2022).



|                      |                  |                  |
|----------------------|------------------|------------------|
| Nkulumane            | 0.012744         | 0.004363         |
| Harare South Eastern | 0.006279         | 0.001920         |
| Harare Western       | 0.006051         | 0.002260         |
| Mutare               | 0.007147         | 0.002197         |
| Bindura              | 0.008952         | 0.001404         |
| Mutoko               | 0.007249         | 0.003871         |
| Zvimba               | 0.004264         | 0.003283         |
| Chivi                | 0.005738         | 0.001995         |
| Tsholotsho           | 0.005191         | 0.001304         |
| Matobo               | 0.003060         | 0.004671         |
| Kwekwe               | 0.004742         | 0.002057         |
| <b>Mean</b>          | <b>0.0065000</b> | <b>0.0027000</b> |

b) Summary of ANOVA results for the two periods

| Groups       | Count     | Sum           | STD Deviation | Variance |
|--------------|-----------|---------------|---------------|----------|
| 2008-08      | 11        | 0.0005        | 0.0026        |          |
| 2018-19      | 11        | 0.0001        | 0.0012        |          |
| <b>Total</b> | <b>22</b> | <b>0.0006</b> | <b>0.0028</b> |          |

c) ANOVA results

| Source of information | SS     | df | MS     | P-value  | F Critical   |
|-----------------------|--------|----|--------|----------|--------------|
| Between-treatments    | 0.0001 | 1  | 0.0001 | 0.000263 | F = 19.54935 |
| Within-treatments     | 0.0001 | 20 | 0      |          |              |
| Total                 | 0.0002 | 21 |        |          |              |

Conclusion: The *f*-ratio value is 19.54935. The *p*-value is .000263. The result is significant at  $p < .05$ . Hence, the MMRs for the two study years are different.

**Table S8: Calculations for Actual ARR and Required ARR to achieve the 2030 target of 140 per 100,000 from 2015 baseline MMR, Target ARR based on the 2007-08 RAMOS, 2015 ZDHS and 2019 MICS MMR Results.**

| ARR Calculated     | Baseline Year (t0) | End year (t1) | Time (t1-t0) | MMR0 | MMR1 | ARR   |
|--------------------|--------------------|---------------|--------------|------|------|-------|
| Achieved 1 (ZMPMS) | 2008               | 2019          | 11           | 657  | 217  | -10.1 |
| Achieved 2 (MMEIG) | 2008               | 2017          | 9            | 790  | 458  | -6.1  |
| Achieved 3 (ZDHS)  | 2010               | 2015          | 5            | 960  | 651  | -7.8  |
| Target 1 (ZMPMS)   | 2008               | 2030          | 22           | 657  | 140  | -7.0  |
| Target 2 (ZDHS)    | 2015               | 2030          | 15           | 651  | 140  | -10.2 |
| Target 3 (MICS)    | 2019               | 2030          | 11           | 462  | 140  | -10.9 |

**Table S9: Zimbabwe Maternal and Perinatal Mortality Study (ZMPMS) Members 2007-08 and 2018-19**

**ZMPMS 2007-8 Group**  
 Stephen Munjanja  
 Thulani Magwali  
 Gwendoline Kandawasvika  
 Davidzoyashe Makosa  
 Maxwell Chirehwa

**ZMPMS 2018-2019 Group**  
 Reuben Musarandega  
 Stephen Munjanja  
 Michael Nyakura  
 Thulani Magwali  
 Gerald Madziyire

Eunice Tahuringana  
Margaret Nyandoro  
Aveneni Mangombe  
Esther Ngaru  
Tsitsi Magure  
Nhamo Gona  
Vongai Dondo  
Ronald Mataya  
Bothwell Guzha  
Jonathan Kasule  
Taurai Gunguwo  
Sarah Manyame  
Julius Chirengwa  
Velda Mushangwe

Gwendoline Chimhini  
Sunhurai Mukwambo  
McMillan Parirenyatwa  
Agnes Mahomva  
Bernard Madzima  
Davidzoyashe Makosa  
Lucia Gondongwe  
Chipo Chimamise  
Winston Chirombe  
Grace Chaora  
Solwayo Ngwenya  
Enesia Ziki  
Mercy Gaza  
Chipo Gwanzura  
Admire Chikutiro  
Rumbidzai Makoni  
Grant Murewanhema

## References

1. MOHCC. National Health Strategy For Zimbabwe 2016-2020. <http://documents1.worldbank.org/curated/en/364731563173429622/pdf/The-National-Health-Strategy-Equity-and-Quality-in-Health-Leaving-No-One-Behind-for-Zimbabwe-2016-2020.pdf> (accessed 27 April 2021).
2. MOHCC. National Health Strategy, 2009 – 2013. <https://extranet.who.int/nutrition/gina/sites/default/filesstore/ZWE%202009%20The%20National%20Health%20Strategy%20for%20Zimbabwe.pdf> (accessed 27 April 2021).
3. JICA. Data Collection Survey on Health Sector: Country Report Republic of Zimbabwe. 2012. <https://openjicareport.jica.go.jp/pdf/12085064.pdf> (2012) (accessed 27 April 2021).
4. USAID. Zimbabwe health system assessment 2010. [https://www.hfgproject.org/wp-content/uploads/2015/02/Zimbabwe\\_Health\\_System\\_Assessment20101.pdf](https://www.hfgproject.org/wp-content/uploads/2015/02/Zimbabwe_Health_System_Assessment20101.pdf) (accessed 24 April 2021).
5. UNICEF. Comparing facility and community level evidence on health services performance 2009 and 2010, Zimbabwe. <https://www.tarsc.org/publications/documents/CMP%20and%20VMAHS%20rep2011.pdf> (27 April 2021).
6. MOHCC. Zimbabwe Service Availability and Readiness Assessment 2015: Assessment Report. <http://ncuwash.org/newfour/wp-content/uploads/2017/08/Zimbabwe-Service-Availability-and-Readiness-Assessment-Report.pdf> (accessed 27 April 2021).
7. Gregson S, Gonese E, Hallett TB, et al. HIV decline in Zimbabwe due to reductions in risky sex? Evidence from a comprehensive epidemiological review. *International journal of epidemiology* 2010; **39**(5): 1311-23.
8. Mahomva A, Greby S, Dube S, et al. HIV prevalence and trends from data in Zimbabwe, 1997-2004. *Sex Transm Infect* 2006; **82 Suppl 1**: i42-7.
9. Hargrove JW, Humphrey JH, Mahomva A, et al. Declining HIV prevalence and incidence in perinatal women in Harare, Zimbabwe. *Epidemics* 2011; **3**(2): 88-94.
10. Gregson S, Mugurungi O, Eaton J, et al. Documenting and explaining the HIV decline in east Zimbabwe: the Manicaland General Population Cohort. *BMJ Open* 2017; **7**(10): e015898.
11. Apollo T, Takarinda K, Mugurungi O, Chakanyuka C, Simbini T, Harries AD. A report on the Zimbabwe Antiretroviral Therapy (ART) programme progress towards achieving MGD6 target 6B: achievement and challenges. *Cent Afr J Med* 2010; **56**(1-4): 12-4.
12. MOHCC. Zimbabwe OI/ART Programme Annual Report 2008. Ministry of Health and Child Care Zimbabwe, OI/ART Unit; Harare, 2009.

13. MOHCC. Zimbabwe national HIV estimates 2009. Ministry of Health and Child Care Zimbabwe; Harare, 2010.
14. Cuneo CN, Sollom R, Beyrer C. The Cholera Epidemic in Zimbabwe, 2008-2009: A Review and Critique of the Evidence. *Health Hum Rights* 2017; **19**(2): 249-64.
15. Munjanja SP, Nyandoro M, Magwali T. Zimbabwe Maternal and Perinatal Mortality Study 2007: Short Report. Ministry of Health and Child Welfare; Harare, 2007.
16. MOHCC. Zimbabwe Maternal and Neonatal Health Roadmap. Zimbabwe Ministry of Health and Child Care; Harare, 2007.
17. UNICEF. Independent evaluation of the Health Development Fund (HDF). [https://www.unicef.org/zimbabwe/media/936/file/Independent%20evaluation%20of%20the%20Health%20Development%20Fund%20\(HDF\).pdf](https://www.unicef.org/zimbabwe/media/936/file/Independent%20evaluation%20of%20the%20Health%20Development%20Fund%20(HDF).pdf) (accessed 7 May 2021).
18. D'Aquino L, Pyone T, Nigussie A, Salama P, Gwinji G, van den Broek N. Introducing a sector-wide pooled fund in a fragile context: mixed-methods evaluation of the health transition fund in Zimbabwe. *BMJ Open* 2019; **9**(6): e024516.
19. UNICEF. Independent evaluation of the Health Development Fund (HDF). <https://www.unicef.org/zimbabwe/reports/independent-evaluation-health-development-fund-hdf> (accessed 10 April 2021).
20. Crown Agents. Waiting homes – the initiative helping more mothers give birth safely in Zimbabwe. 7th April 2021 2021. <https://www.crownagents.com/blog-post/waiting-mothers-homes-the-initiative-helping-more-mothers-give-birth-safely-in-zimbabwe/> (accessed 19 July 2021).
21. USAID. Assessment of opportunities to deliver oral PrEP for women through private sector health care: Zimbabwe research findings. <https://www.prepwatch.org/wp-content/uploads/2017/09/Private-Health-Sector-Landscape-Zimbabwe.pdf> (accessed 27 April 2021).
22. RCOG. Life Saving Skills Manual: Essential Obstetric and Newborn Care. 2nd ed. The Royal College of Obstetricians and Gynaecologist; Glasgow, 2007.
23. Tumwine JK, Dungare PS. Maternity waiting shelters and pregnancy outcome: experience from a rural area in Zimbabwe. *Ann Trop Paediatr* 1996; **16**(1): 55-9.
24. UNICEF. A 'Sheltering' Grace: The maternity waiting home giving hope to mothers in rural Zimbabwe. 10 May 2021 2021. <https://www.unicef.org/zimbabwe/stories/sheltering-grace-maternity-waiting-home-giving-hope-mothers-rural-zimbabwe> (accessed 19 July 2021 2021).
25. UNFPA. Maternity Waiting Homes: Promoting Institutional Delivery and Pregnant Women's Access to Skilled Care 2012. <https://zimbabwe.unfpa.org/sites/default/files/pub-pdf/maternitywaitinghomes.summary.pdf> (accessed 19 July 2021).
26. MOHCC. Maternal and Perinatal Death Surveillance and Response Report. Ministry of Health and Child Care Zimbabwe; Harare, 2018.
27. MOHCC. Guidelines for Maternal and Perinatal Death Audits in Zimbabwe. Zimbabwe Ministry of Health and Child Care; Harare, 2013.
28. MCHIP. Assessment of Maternal and Perinatal Death Surveillance and Response Implementation in Zimbabwe. *Technical report* 2017. <https://www.mcsprogram.org/resource/assessment-maternal-perinatal-death-surveillance-response-implementation-zimbabwe/> (accessed 7 April 2021).
29. MOHCC. Global AIDS Monitoring: Zimbabwe country progress report 2019. [https://www.unaids.org/sites/default/files/country/documents/ZWE\\_2019\\_countryreport.pdf](https://www.unaids.org/sites/default/files/country/documents/ZWE_2019_countryreport.pdf) (accessed 7 May 2021).
30. UNAIDS. UNAIDS Data 2019. United Nations Joint Program on HIV and AIDS. [https://www.unaids.org/sites/default/files/media\\_asset/2019-UNAIDS-data\\_en.pdf](https://www.unaids.org/sites/default/files/media_asset/2019-UNAIDS-data_en.pdf) (accessed 19 July 2021).
31. Avert. Global information and education on HIV and AIDS: HIV AND AIDS IN ZIMBABWE. 24 August 2020 2021. <https://www.avert.org/professionals/hiv-around-world/sub-saharan-africa/zimbabwe> (accessed 19 July 2021).

32. ICAP. Zimbabwe Population-based HIV Impact Assessment (ZIMPHIA) 2015–2016. <https://phia.icap.columbia.edu/zimbabwe-final-report/> (accessed 14 November 2020).
33. ICAP. Zimbabwe Population-based HIV Impact Assessment (ZIMPHIA) 2020. <https://phia.icap.columbia.edu/zimbabwe-2020-summary-sheet/> (accessed 14 November 2020).
34. Musarandega R, Robinson J, Sen PD, et al. Using the critical path method to rollout and optimise new PMTCT guidelines to eliminate mother-to-child transmission of HIV in Zimbabwe: a descriptive analysis. *BMC Health Services Research* 2020; **20**(1).
35. MOHCC. Global AIDS response progress report 2018: Zimbabwe country progress report for reporting period January - December 2017. [https://www.unaids.org/sites/default/files/country/documents/ZWE\\_2018\\_countryreport.pdf](https://www.unaids.org/sites/default/files/country/documents/ZWE_2018_countryreport.pdf) (accessed 14 May 2021).
36. Bhat N, Kilmarx PH, Dube F, Manenji A, Dube M, Magure T. Zimbabwe's national AIDS levy: A case study. *SAHARA J* 2016; **13**(1): 1-7.
